# Supplementary material for: Regulation of cellular and molecular markers of epithelial-mesenchymal transition by Brazilin in breast cancer cells
Source: PeerJ journal article supplement (doi:10.7717/peerj.17360), 2024-05-09
Supplement: Figure1data.pdf [file Figure1data.pdf]

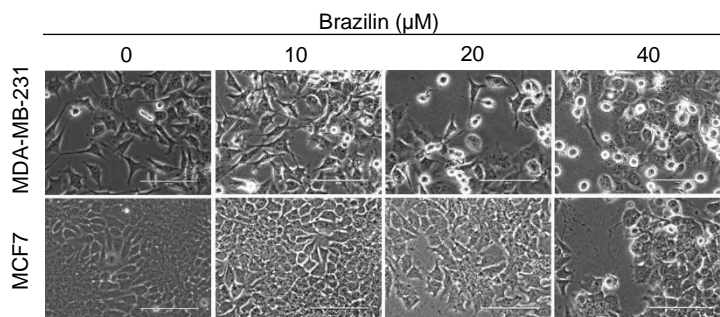

**Figure 1. Brazilin induces morphological changes in MDA-MB-231, and MCF7 cells.**

**A)** Brazilin 10, 20, and 40  $\mu\text{M}$  for 24 h induced morphological changes of MDA-MB-231 and MCF7 cells.

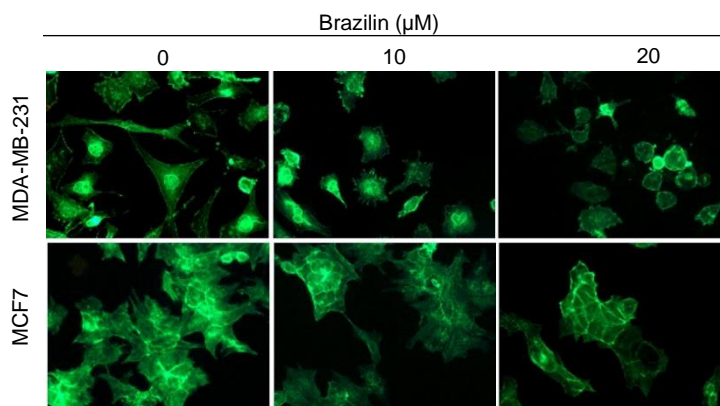

**Figure 1. Brazilin induces morphological changes in MDA-MB-231, and MCF7 cells.**

**C)** Brazilin at 20 and 40  $\mu\text{M}$  induces changes in actin polymerization in MDA-MB-231 and MCF7 cells.
