# Supplementary material for: Regulation of cellular and molecular markers of epithelial-mesenchymal transition by Brazilin in breast cancer cells
Source: PeerJ journal article supplement (doi:10.7717/peerj.17360), 2024-05-09
Supplement: Figure2data.pdf [file Figure2data.pdf]

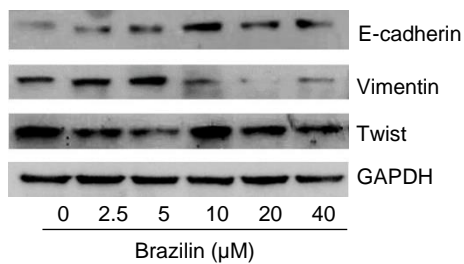

**Figure 2. Brazilin regulates E-cadherin, vimentin, and Twist protein levels in MDA-MB-231 cells.** Cells were treated with brazilin 0-40  $\mu$ M for 24 h. A) Representative Western blot of E-cadherin (B), vimentin (C), and Twist (D) levels.

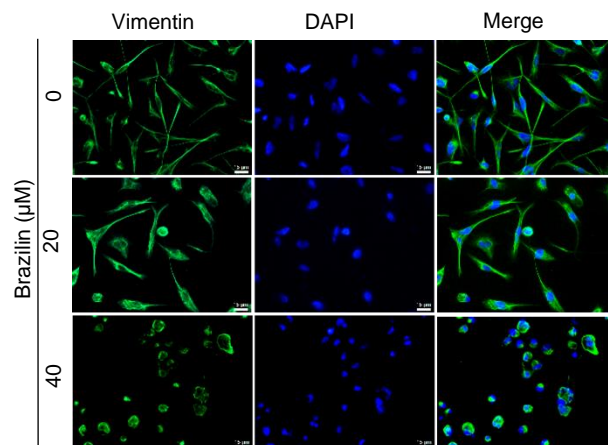

**Figure 2. Brazilin regulates E-cadherin, vimentin, and Twist protein levels in MDA-MB-231 cells.** Representative images of vimentin (E) by immunofluorescence assays, blue shows nuclei staining. Images were obtained at 40X objective.

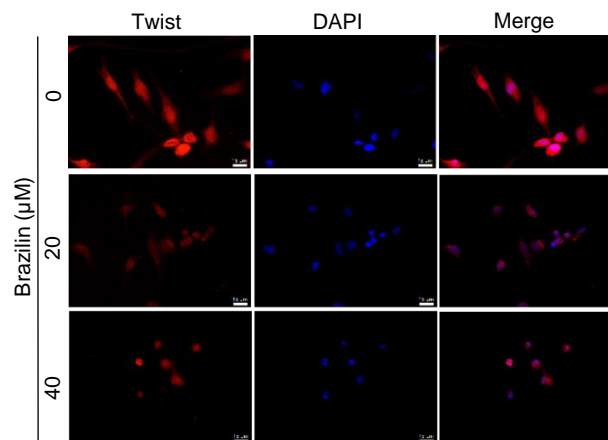

**Figure 2. Brazilin regulates E-cadherin, vimentin, and Twist protein levels in MDA-MB-231 cells.** Representative images of Twist (F) by immunofluorescence assays, blue shows nuclei staining. Images were obtained at 40X objective
