# Supplementary material for: Regulation of cellular and molecular markers of epithelial-mesenchymal transition by Brazilin in breast cancer cells
Source: PeerJ journal article supplement (doi:10.7717/peerj.17360), 2024-05-09
Supplement: Figure3data.pdf [file Figure3data.pdf]

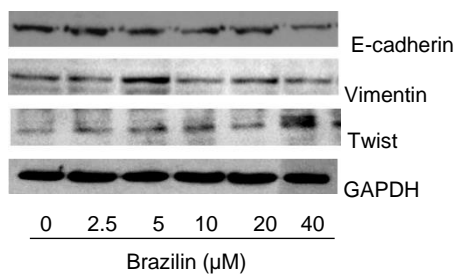

**Figure 3. Brazilin regulates E-cadherin, vimentin, and Twist protein expression levels in MCF7 cells.** The cell cultures were treated with brazilin 0, 2.5, 5, 10, 20, and 40  $\mu$ M for 24 h. A) Representative Western blot of brazilin effect of E-cadherin (B), vimentin (C), and Twist (D) levels.

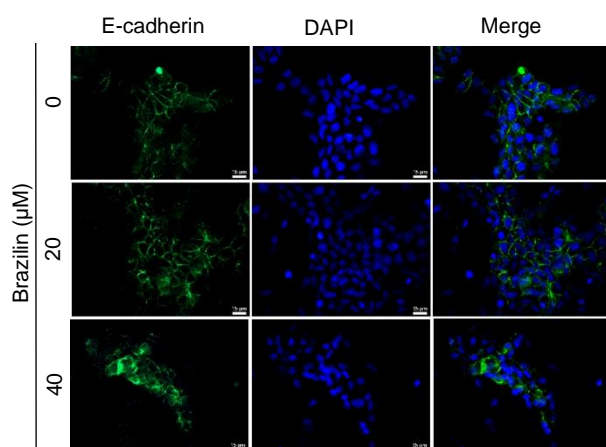

**Figure 3. Brazilin regulates E-cadherin, vimentin, and Twist protein expression levels in MCF7 cells.** The cell cultures were treated with brazilin 0, 2.5, 5, 10, 20, and 40  $\mu$ M for 24 h. Representative images of E-cadherin (E) immunofluorescence assay, blue shows staining of nuclei. Images were obtained at 40X objective.

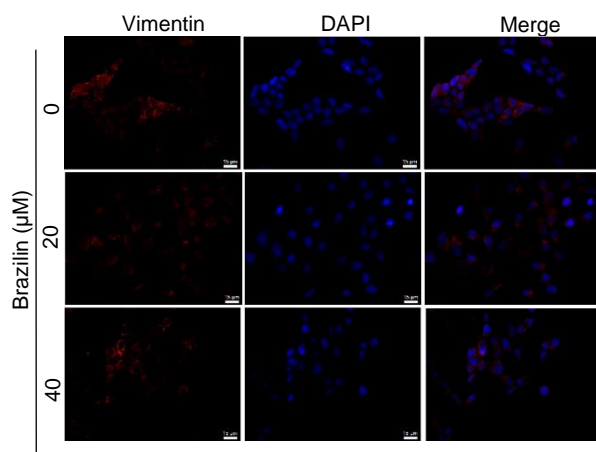

**Figure 3. Brazilin regulates E-cadherin, vimentin, and Twist protein expression levels in MCF7 cells.** The cell cultures were treated with brazilin 0, 2.5, 5, 10, 20, and 40  $\mu$ M for 24 h. Representative images of vimentin (F) immunofluorescence assay, blue shows staining of nuclei. Images were obtained at 40X objective.
