# Supplementary material for: Regulation of cellular and molecular markers of epithelial-mesenchymal transition by Brazilin in breast cancer cells
Source: PeerJ. 2024 May 9;12:e17360. doi: 10.7717/peerj.17360 (PMC11088821; doi:10.7717/peerj.17360)
Supplement: Supplemental Information 9 — Densitometric and statistical analysis of the values obtained by western blot and gelatin zymography. [file peerj-12-17360-s009.xlsx]

## Sheet: Hoja1
Data from densitometric analysis of three independent replicates (R1, R2, and R3) of the effect of brazilin on E-cadherin, vimentin, and Twits levels in MDA-MB-231 cells.
MDA-MB-231 CELLS WESTERN BLOT
E-CADHERIN	0	2.5	5	10	20	40	µM Brazilin
R1	1	0.991129	1.07277	1.5	1.03265	1.77815
R2	1	1.27918	1.40393	2.85111	1.475	2.65155
R3	1	1.63814	1.88203	3.91441	2.69217	3.05713
VIMENTIN	0	2.5	5	10	20	40	µM Brazilin
R1	1	0.996809	1.4	0.536481	0.380619	0.408268
R2	1	1.38951	1.63	0.755096	0.46138	0.545244
R3	1	0.98654	1.3567	0.3578	0.50987	0.2987
TWIST	0	2.5	5	10	20	40	µM Brazilin
R1	1	0.472571	0.46484	0.444426	0.921499	0.3839
R2	1	0.587449	1.00712	0.882721	0.637021	0.179762
R3	1	0.811841	0.305125	1.28243	0.484638	0.393729

## Sheet: Hoja2
Data from densitometric analysis of three independent replicates (R1, R2, and R3) of the effect of brazilin on E-cadherin, vimentin, and Twits levels in MCF7 cells.
MCF7 CELLS WESTERN BLOT
E-CADHERIN	0	2.5	5	10	20	40	µM Brazilin
R1	1	1.81428	1.5204	0.963128	1.31746	1.78659
R2	1	1.34239	1.67447	1.56253	1.30346	0.414972
R3	1	1.17985	0.906893	0.8384	1.0256	0.571288
VIMENTIN	0	2.5	5	10	20	40	µM Brazilin
R1	1	0.858492	1.30502	1.3	0.461837	0.475063
R2	1	0.766607	1.19138	0.634152	0.633981	0.614005
R3	1	1.1192	1.05564	0.600677	0.215272	0.326584
TWIST	0	2.5	5	10	20	40	µM Brazilin
R1	1	1.10787	1.17519	0.960635	1.12835	0.840421
R2	1	0.926418	1.39382	1.47338	0.97089	1.20631
R3	1	0.87546	0.75467	1.04567	1.09874	1.12345

## Sheet: Hoja3
Data from densitometric analysis of three independent replicates (R1, R2, and R3) of the effect of brazilin on MMP-9, MMP-2 secretion levels and cell invasion in MDA-MB-231 cells.
MDA-MB-231 CELLS GEL ZYMOGRAPHY
MMP-9	0	2.5	5	10	20	40	µM Brazilin
R1	1	0.830067	0.955613	0.88769	0.718811	0.545965
R2	1	1.14321	1.09723	1.14828	0.342387	0.263437
R3	1	0.801802	0.855072	0.527022	0.393622	0.411477
MMP-2	0	2.5	5	10	20	40	µM Brazilin
R1	1	0.943535	0.990097	0.943088	0.649895	0.379948
R2	1	1.28718	1.37783	0.537719	0.357604	0.184549
R3	1	0.668119	0.613449	0.926393	0.191004	0.0094484
CELL INVASION MDA-MB-231
	0	Posive control	20 µM Brazilin
R1	1	1.6445	0.68682
R2	1	1.36066	0.679508
R3	1	1.54918	0.559563

## Sheet: Hoja4
Data from densitometric analysis of three independent replicates (R1, R2, and R3) of the effect of brazilin on MMP-9, MMP-2 secretion levels and cell invasion in MCF7 cells.
MCF7 CELLS GEL ZYMOGRAPHY
MMP-9	0	2.5	5	10	20	40	µM Brazilin
R1	1	1.08609	1.12792	0.973607	0.492901	0.0664087
R2	1	1.27561	1.25867	0.526182	0.264121	0.0161882
MMP-2	0	2.5	5	10	20	40	µM Brazilin
R1	1	0.76086	0.634863	0.379169	0.0932533	0.100606
R2	1	0.504077	0.37487	0.234381	0.165748	0.0295644
CELL INVASION MDA-MB-231
	0	control positive	20 µM Brazilin
R1	1	1.36405	0.427686
R2	1	1.3551	0.758018
R3	1	1.6942	0.301449

## Sheet: Hoja5
Data from three independent replicates (R1, R2, and R3) of the effect of braziliin on the morphology of MDA-MB-231 and MCF7 cells. Cell morphology quantification data.
ROUNDED MDA-MB-231 CELLS
	0	10	20	40	µM Brazilin
R1	8	14	23	38
R2	7	12	25	45
R3	6	16	19	40
ROUNDED MCF7 CELLS
	0	10	20	40	µM Brazilin
R1	4	7	7	22
R2	5	6	9	28
R3	3	5	15	35
ASPECT RATIO MDA-MB-231 CELLS						ASPECT RATIO MCF7 CELLS
No. Cells	0	20	40	µM Brazilin		No. Cells	0	20	40	µM Brazilin
1	5.69776	2.8237	3.21942			1	1.98775	2.64912	2.20795
2	5.67907	1.57719	2.23473			2	1.5798	1.30029	1.35492
3	2.96737	2.28875	1.14888			3	2.57143	2	1.05342
4	4.21296	1.61758	1.66501			4	1.74208	2.22414	2.52837
5	6.46763	2.90072	2.91403			5	2.12376	1.58873	1.42553
6	1.69398	1.10943	2.04683			6	2.0099	2.34173	2.67092
7	7.44521	2.54338	1.75959			7	2.70667	2.56962	1.54305
8	3.58127	2.76344	1.14356			8	2.08967	3.18565	2.16511
9	5.92188	1.52806	1.51878			9	2.28634	2.19915	1.29546
10	2.97712	1.72973	1.57647			10	1.30394	1.63352	1.71622
11	3.88	2.80997	1.57692			11	3.08099	2.06557	2.57143
12	3.45388	1.9527	2.11143			12	3.76471	1.23741	1.86742
13	3.61238	1.39221	2.15985			13	1.80315	1.76639	1.8386
14	6.12821	1.54785	1.19048			14	2.2551	2.38339	1.44237
15	3.00556	2.98879	1.46154			15	2.27599	3.0197	1.23248
16	6.04981	2.33125	1.38693			16	2.16832	2.05587	1.23423
17	6.28685	3.10656	1.32174			17	2.21607	2.16554	3.73413
18	7.45985	2.37192	1.42308			18	4.58824	2.54307	1.87455
19	2.67026	2.44406	1.13185			19	3.57721	1.08651	2.02048
20	2.96934	3.28634	3.64667			20	2.53261	1.47826	2.72937
21	2.67841	3.87302	1.52402			21	1.84739	2.53055	2.01056
22	1.15419	3.57637	1.47432			22	3.94175	1.81081	1.69099
23	7.91329	3.36735	2.30341			23	2.65833	1.51273	2.60219
24	2.01166	1.87273	3.15936			24	2.19932	1.4702	1.94819
25	4.64674	3.40118	1.16279			25	4.38095	1.88736	2.87786
26	1.91009	2.50943	1.36565			26	1.77737	1.13305	1.61592
27	4.61538	1.62	1.53083			27	2.4735	2.22248	1.19868
28	5.10032	2.48174	0.910377			28	2.43529	2.22105	1.33333
29	4.06114	4.79147	1.7493			29	2.12245	1.58186	2.66531
30	5.98233	2.51304	2.16349			30	3.05911	1.8648	1.29385
31	4.58108	4.0082	1.2764			31	1.96429	1.50099	1.34446
32	4.57592	4.776	2.37631			32	1.55294	2.22615	1.23
33	3.22222	5.97521	1.43309			33	3.57209	1.9573	2.03606
34	3.36552	2.65934	1.12733			34	2.05867	1.3913	3.23651
35	3.79787	3.45725	1.41032			35	1.88838	1.15873	1.72541
36	5.05592	1.7781	2.35294			36	2.08333	2.31014	1.82178
37	1.96302	1.37048	1.44371			37	2.29167	2.17227	2.25632
38	2.69298	2.28571	1.0309			38	2.97452	1.48624	2.01476
39	3.2309	2.53667	1.65789			39	1.35637	2.05322	3.23429
40	7.53695	1.88562	3.645			40	2.18461	1.06762	2.79487
41	2.95733	1.65237	1.46233			41	2.41494	1.9581	2.07117
42	1.62687	3.44574	1.14613			42	1.75645	2.88955	2.46905
43	10.2028	2.35211	1.39236			43	2.65918	1.97818	1.33887
44	3.28224	2.22677	1.01266			44	1.61563	1.73502	1.64078
45	3.2633	1.87811	2.15756			45	1.95139	2.0424	1.3125
46	4.01531	1.58675	1.919			46	1.89008	1.96181	2.09483
47	4.5	1.98844	1.22879			47	2.90254	1.9322	2.12774
48	3.5584	3.5798	1.10183			48	2.56623	1.77143	1.07936
49	2.28306	2.17195	1.11563			49	2.27273	3.79439	2.4141
50	2.80357	1.80223	1.87449			50	2.62541	3.64552	1.6123
51	3.8327	1.74059	1.1584			51	2.02535	2.18551	1.33584
52	2.41801	1.49323	1.85294			52	2.83922	4.41463	2.53731
53	3.69444	2.27696	2.04207			53	2.08163	2.26471	2.22762
54	3.19277	1.84571	1.49602			54	1.97115	1.26316	2.10801
55	4.4644	2.8979	1.21622			55	2.32362	1	2.05161
56	4.22713	2.84679	1.34442			56	2.70621	2.78226	1.84615
57	5.22384	2.76812	1.32174			57	2.04	1.23465	3.06699
58	5.08645	3.64305	1.47436			58	1.82972	0.12551	2.40996
59	1.81149	3.55849	1.19079			59	2.68196	1.05839	1.58772
60	4.22713	3.64305	1.2278			60	1.7653	1.03452	1.4356
